# Supplementary figures and images for: Adaptation Potential of Three Psychrotolerant Aquatic Bacteria in the Pan-Okhotsk Region
Source: MDPI journal article supplement (doi:10.3390/w14071107), 2022-03-30

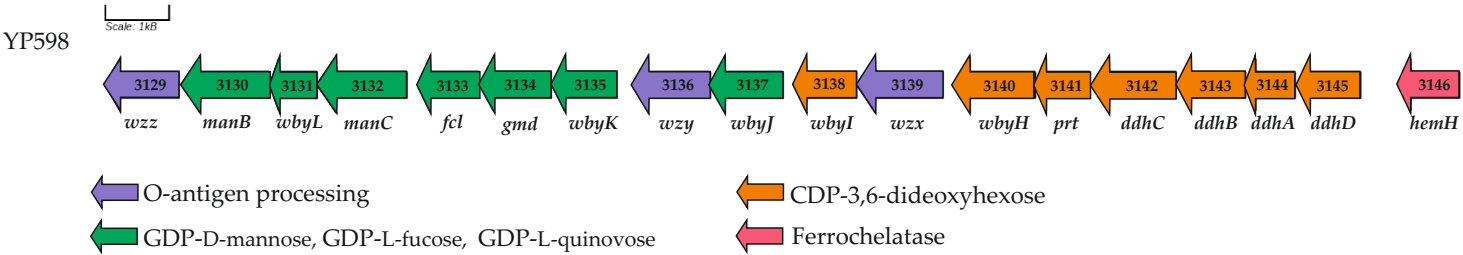

**Figure S1.** *Y. pseudotuberculosis* 598 O-antigen gene cluster.

Supplement: s1 [file s1]
